# Supplementary material
Source: PubMed Central journal article supplement (PMC4301413)
Supplement: NIHMS582294-supplement-07.pdf [file NIHMS582294-supplement-07.pdf]

| name       | age range (age of peak growth)    | RD range (% change/year)                              | p          |
|------------|-----------------------------------|-------------------------------------------------------|------------|
| all        | 8.2-16.1 (8.2)                    | 0.000613-0.000583 (-0.602)                            | 2.3e-07 *  |
| proj       | 11.7-15.6 (13.6)                  | 0.000498-0.000487 (-0.557)                            | 0.0088 *   |
| assoc      | 8.2-16.4 (8.2)                    | 0.000578-0.000545 (-0.673)                            | 2.1e-08 *  |
| assoc.limb | 11.1-16 (13.7)                    | 0.000631-0.000607 (-0.771)                            | 2.8e-07 *  |
| cal        | 12.1-15.5 (13.8)                  | 0.000455-0.000443 (-0.724)                            | 0.029 *    |
| cer.c      | 10.2-15.8 (10.2)                  | 0.000592-0.000561 (-0.931)                            | 3.6e-05 *  |
| ML         | 12.3-15.4 (13.9)                  | 0.000432-0.000416 (-1.16)                             | 0.014      |
| PCT        | 12.9-14.2 (14)                    | 0.000562-0.000555 (-0.908)                            | 0.17       |
| CST        | 11.8-16.1 (13.7)                  | 0.000543-0.000512 (-1.29)                             | 0.00011 ** |
| CP         | 11.3-13.6 (11.3)                  | 0.000449-0.00044 (-0.829)                             | 0.026      |
| IC.A       | 12.2-15.6 (13.9)                  | 0.000463-0.000448 (-0.967)                            | 0.0061 *   |
| IC.P       |                                   |                                                       | 0.81       |
| IC.R       | 11.8-13.2 (11.8)                  | 0.00052-0.000516 (-0.502)                             | 0.029      |
| CR.A       | 12.7-13.3 (13.3)                  | 0.000507-0.000505 (-0.581)                            | 0.19       |
| CR.S       | 11.4-15.8 (13.2)                  | 0.000519-0.000508 (-0.483)                            | 7e-04 **   |
| CR.P       | 11.4-14.2; 15-16.2 (11.4; 15)     | 0.000586-0.000577; 0.000574-0.000571 (-0.399; -0.117) | 0.00027 ** |
| PTR        | 12.7-13.6 (13.6)                  | 0.000501-0.000498 (-0.716)                            | 0.17       |
| SFOF       | 15.2-17.4 (16.4)                  | 0.000457-0.00045 (-0.64)                              | 0.0067 *   |
| SS         | 10.7-16.9 (13.2)                  | 0.000581-0.000553 (-0.762)                            | 7.3e-08 ** |
| EC         | 10.1-14.3 (10.1)                  | 0.000578-0.000561 (-0.672)                            | 0.00047 ** |
| UF         | 11.7-13.5 (11.7)                  | 0.00055-0.000542 (-0.802)                             | 0.001 **   |
| SLF        | 8.7-16.8 (8.7)                    | 0.000569-0.000536 (-0.7)                              | 4.9e-08 ** |
| FOR.CB     | 19.6-23.1 (23.1)                  | 0.000896-0.000942 (1.42)                              | 0.18       |
| FOR.C      | 12.7-15.9 (14.3)                  | 0.000595-0.000582 (-0.627)                            | 0.0055 *   |
| CIN.CG     | 8.2-16.1; 19-21.1 (8.2; 21.1)     | 0.000581-0.000519; 0.000513-0.000507 (-1.04; -0.104)  | 3.2e-09 ** |
| CIN.H      | 11.6-16.1 (13.9)                  | 0.000643-0.000609 (-1.15)                             | 1.3e-07 ** |
| CAL.G      |                                   |                                                       | 0.79       |
| CAL.B      | 11.6-15.8 (13.5)                  | 0.000559-0.000539 (-0.806)                            | 0.0023 **  |
| CAL.S      | 12.2-14 (13.7)                    | 0.000389-0.000383 (-0.724)                            | 0.027      |
| CAL.T      | 12.8-15.4 (14.1)                  | 0.000606-0.000586 (-1.22)                             | 0.032      |
| CER.I      | 12.6-17.1 (14.5)                  | 6e-04-0.000584 (-0.579)                               | 0.00011 ** |
| CER.M      | 8.2-14.5 (8.2)                    | 0.000641-0.000584 (-1.4)                              | 1.9e-05 ** |
| CER.S      | 11.4-14.9 (13.2)                  | 0.000554-0.000528 (-1.32)                             | 0.0014 **  |
| par        | 8.2-17.1; 18.1-20.3 (8.2; 18.1)   | 0.000674-0.000632; 0.00063-0.000627 (-0.546; -0.0514) | 5.1e-12 *  |
| occ        | 11.8-15.4; 18.6-19.3 (13.7; 18.6) | 0.000664-0.00065; 0.000653-0.000654 (-0.469; 0.0408)  | 0.00073 *  |
| sm         | 8.2-20.5 (8.2)                    | 0.000628-0.000572 (-0.716)                            | 2.2e-16 *  |
| fron       | 11.6-16.2 (13.8)                  | 0.000611-0.000593 (-0.603)                            | 6.6e-06 *  |
| temp       | 8.2-16.8 (8.2)                    | 0.000695-0.000655 (-0.666)                            | 1.7e-13 *  |
| cer.p      | 19.3-22.6 (22.6)                  | 0.000658-0.000665 (0.327)                             | 0.067      |
| mt         | 12.2-13 (13)                      | 0.000774-0.000771 (-0.481)                            | 0.046      |
| bg         | 12.1-15.9 (13.7)                  | 0.00064-0.000626 (-0.567)                             | 0.00024 *  |
| thal       | 8.2-13.2; 19.2-21.5 (8.2; 21.5)   | 0.000701-0.000676; 0.000677-0.00068 (-0.461; 0.0649)  | 0.0021 *   |
